1 **Title**

2 Mass evacuation and increases in long-term care benefits: lessons from the Fukushima  
3 nuclear disaster

4

5 **Running Title**

6 Mass evacuation and long-term care benefits

7

8 **Authors**

9 Tomohiro Morita,<sup>1</sup> Michihito Ando<sup>2</sup>, Yui Ohtsu,<sup>3</sup>

10

11 **Affiliations**

12 1. Internal Medicine, Soma Central Hospital, 3-5-18, Soma, Fukushima, Japan

13 2. Department of Economics, Rikkyo University, 3-34-1, Toshima-ku, Tokyo,  
14 Japan.

15 3. Department of Empirical Social Security Research, National Institute of  
16 Population and Social Security Research

17

18

19 **Corresponding author:**

20 Tomohiro Morita

21 Soma Central Hospital

22 3-5-18, Okinouchi, Soma City, Fukushima, 976-0016

23 E-mail: t.morita526@gmail.com

24 Tel +81-90-8212-1356

25 Fax +81-244-35-4234

26

## 27 **Abstract**

### 28 **Background**

29 Though mass evacuation may increase the need for long-term care (LTC) services, how  
30 the need for LTC services increases and how the public LTC system affects it is not  
31 well understood. We evaluated changes in public LTC benefits for the people living in  
32 the mandatory evacuation areas established after the 2011 Fukushima nuclear disaster  
33 and examined the roles of the universal LTC insurance system in Japan.

34

### 35 **Methods**

36 In order to evaluate the effect of the mandatory evacuation on LTC benefits, we  
37 examined the trends of LTC benefits in the Fukushima evacuation group and the  
38 nationwide non-evacuation group. We first decomposed per-elderly-individual benefits  
39 at the municipality level into the LTC certification rate and per-certified-individual  
40 benefits, and then implemented difference-in-differences analysis using these variables  
41 as outcomes.

42

### 43 **Results**

44 Per-elderly-individual benefits significantly increased from 2012 onward in the  
45 evacuation group, and this was explained by an increase in the certification rate rather  
46 than in per-certified-individual benefits. Increases in per-elderly-individual benefits and  
47 the certification rate in the post-disaster period were observed in all but the highest care  
48 level, and the corresponding outcomes for the highest care level decreased immediately

49 after the disaster. We also found that the increase in the certification rate had been  
50 mostly realized by an increase in the number of certified individuals.

51

## 52 **Conclusions**

53 The increase in LTC benefits can be associated with the impact of the increase in the  
54 number of people newly certified to receive LTC benefits after the mandatory  
55 evacuation. In order to cope with the increase in utilization of long-term care and  
56 associated costs after disasters in aging societies, both formal long-term care services  
57 and social support for informal care for evacuees should be considered important.

58

59 **Keywords:** Disasters, Long-Term Care, Displacement, Aging,  
60 Difference-in-Differences

61

62

## 63 **1. Introduction**

64 Natural and manmade disasters, such as earthquakes, floods, and fires, often lead to  
65 mass evacuation and/or relocation. In 2015, there were 27.8 million people newly  
66 involved in evacuation or relocation caused by disasters worldwide [1]. Damage to  
67 communities following a mass evacuation has become a social issue. As the number of  
68 elderly people increases throughout the world, the health effects due to damage to  
69 communities seem likely to become more severe, but these adverse effects, especially in  
70 the long-term, are not clearly understood.

71

72 Mass evacuation in an aging society is exemplified by the case of the 2011 Fukushima  
73 nuclear disaster, which occurred after the Great East Japan Earthquake and Tsunami on  
74 March 11, 2011. Following a series of government evacuation orders, more than  
75 160,000 citizens were evacuated from the areas surrounding the nuclear power plant [2].  
76 In particular, the entire population of the nine municipalities closest to the damaged  
77 nuclear plant, nearly 80,000 citizens, was forced to evacuate.

78

79 This mass evacuation not only raised the mortality of the elderly in the short term [3],  
80 but may also have increased the utilization of public long-term care (LTC) services  
81 [4-6]. However, *how* such an evacuation affects the utilization of LTC services is still  
82 not well understood. Do the elderly people who had already been using LTC services  
83 before the evacuation use more LTC services after it? Or do the elderly people who had  
84 not been using any LTC services before the evacuation start doing so after they have  
85 been evacuated? The objective of this study is to assess the factors behind the increase

86 in LTC utilization after an evacuation, which are important for policy makers in  
87 countries that frequently experience natural disasters and subsequent evacuations. We  
88 examined how the utilization of public LTC benefits changed after the evacuation  
89 among citizens who had lived in the mandatory evacuation areas of the 2011 Fukushima  
90 nuclear disaster using the difference-in-differences (DID) method.

91

## 92 **2. Materials and methods**

### 93 **2.1. Settings**

94

95 After the 2011 Fukushima nuclear disaster, evacuation instructions were issued by the  
96 Japanese government on March 12, 2011 for a 20km area surrounding the nuclear plant  
97 and in areas where the annual cumulative radiation dose was expected to exceed 20  
98 mSv/year. As a result, eight whole municipalities (the villages of Iitate, Katsurao, and  
99 Kawauchi and the towns of Namie, Futaba, Okuma, Tomioka, and Naraha) were  
100 designated as mandatory evacuation areas. One additional municipality, the town of  
101 Hirono, also decided to issue a mandatory evacuation order to all of its residents at the  
102 direction of its mayor. As a result, a total of 78,768 residents were forced to evacuate.  
103 According to the National Population Census, elderly residents (aged 65 and older)  
104 accounted for 25.1% (19,792/78,768) of the population in these nine municipalities at  
105 the time of the disaster. Parts of three municipalities (the cities of Minamisoma and  
106 Tamura and the town of Kawamata) were also designated as mandatory evacuation  
107 areas. In total, 164,865 Fukushima residents were evacuated.

108

109 In Japan, all people aged 65 and older have been insured by public LTC insurance since  
110 2000. When an individual wants to make use of this insurance, municipalities conduct  
111 interviews and surveys concerning his or her living situation. An initial assessment is  
112 then used to assign the applicant to one of the eight LTC need levels (not certified,  
113 support level 1–2, and care level 1–5). The final LTC need level is decided by the Care  
114 Needs Certification Board, a committee of medical and other professionals. The  
115 maximum amount of expenditure covered by the LTC insurance is fixed in accordance  
116 with the applicant’s level as determined by this process [7].

117

## 118 **2.2. Data**

119

120 In order to evaluate the effect of the mandatory evacuation on LTC benefits, we  
121 examined the LTC benefits in the eight “evacuation” municipalities and compared them  
122 to those observed nationwide.[8]

123

124 We first define  $Q_{it}$  as the aggregated quantity of LTC benefits, which is measured as  
125 the amount of LTC benefits per elderly individual for municipality  $i$  in fiscal year  $t$ .

126 Then we can decompose  $Q_{it}$  as follows [9]:

127

$$128 \quad Q_{it} \equiv \frac{\text{Total benefits}}{\# \text{ of elderly}} = \frac{\# \text{ of certified elderly}}{\# \text{ of elderly}} \frac{\text{Total benefits}}{\# \text{ of certified elderly}} \equiv C_{it} B_{it} ,$$

129

130 where  $C_{it}$  is the LTC certification rate (i.e. the ratio of elderly people certified to  
131 receive LTC benefits to the total elderly population in question) and  $B_{it}$  is the amount

132 of LTC benefits per certified individual. We call  $Q$  “per-elderly-individual benefits”,  $C$   
133 “certification rate”, and  $B$  “per-certified-individual benefits” and examine these three  
134 variables.

135

136 In addition, because the certified elderly are categorized into seven care levels (support  
137 level 1-2 and care level 1–5), we also investigate LTC benefits disaggregated by care  
138 level. For example, we use disaggregated outcomes for care level 1 as

139

$$140 \quad Q_{it}^{Care1} \equiv \frac{\text{Total benefits for care level 1}}{\text{\# of elderly}},$$

141

$$142 \quad C_{it}^{Care1} \equiv \frac{\text{\# of certified elderly for care level 1}}{\text{\# of elderly}}, \text{ and}$$

143

$$144 \quad B_{it}^{Care1} = \frac{\text{Total benefits for care level 1}}{\text{\# of certified elderly for care level 1}}.$$

145

146 We can also define disaggregated outcomes for support levels 1-2 and care levels 2-5 in  
147 the same manner. See Table 1 for the descriptive statistics of the aggregated and  
148 disaggregated outcome variables. All the variables are constructed from the Status  
149 Report on the Long-term Care Insurance collected by the Ministry of Health, Labour  
150 and Welfare of Japan. This report provides municipality-level data based on  
151 administrative data about all the benefits dispensed through public LTC insurance for  
152 each municipality in an open public database. From this public database, we extracted  
153 the annual data on LTC benefits, the number of elderly people certified to receive LTC  
154 benefits, and the population over 65 years of age in each municipality. Some

155 municipalities organized or joined inter-municipality insurance coalitions, and some  
156 municipalities merged during the sample period (2007-2014). In these cases, we  
157 aggregated the LTC benefits data and population data based on municipalities as they  
158 were constituted in 2014.

159

160 When it comes to the number of certified elderly individuals and the population over 65  
161 years of age, these values are measured in the last month of the fiscal year (March of the  
162 following calendar year because the Japanese fiscal year starts in April). LTC benefits,  
163 which are measured in so-called “benefit points” (1 point = 10 yen in a standard area),  
164 are in turn aggregated from March to February of the following calendar year. This is  
165 somewhat confusing because the first month is March, not April (the first month of the  
166 fiscal year). This is advantageous in our case, however, because the disaster occurred on  
167 the 11<sup>th</sup> of March, 2011, and therefore the survey of the year for 2011 consists of data  
168 concerning only post-disaster months (March 2011-February 2012).

169

170 It should be noted that the residential status (registered place of residence) of citizens  
171 remained the same after the mandatory evacuation if they wanted it to, and they were  
172 given financial support unless they changed it [10]. Most of the LTC benefits for these  
173 citizens were therefore financed by these nine municipalities before, during, and after  
174 the evacuation. These circumstances enable us to assess the impact of the mandatory  
175 evacuation on LTC benefits.

176

## 177 **2.3. Methods**



178

179 In order to investigate how this evacuation has affected the utilization of LTC services,  
180 we examine how per-elderly-individual benefits ( $Q$ ), certification rate ( $C$ ), and  
181 per-certified-individual benefits ( $B$ ) have changed over time in the evacuation group (i.e.  
182 those who had been living in evacuation areas before the disaster) by implementing  
183 simple difference-in-differences (DID) estimations. The estimation model is expressed  
184 as follows:

185

$$186 \quad Y_{it} = \pi_i + \theta_t + \sum_{\tau \neq 2009} \beta_{\tau}(T_{\tau} \cdot D_i) + \varepsilon_{it}, \quad (1)$$

187

188 where  $Y_{it}$  is either  $Q_{it}$ ,  $C_{it}$ , or  $B_{it}$ ,  $\pi_i$  is a municipality fixed effect,  $\theta_t$  is a time  
189 fixed effect,  $T_{\tau}$  is a time dummy variable that takes one if  $t = \tau$ ,  $D_i$  is a “treatment”  
190 dummy variable that takes one if municipality  $i$  is entirely included in evacuation areas  
191 in Fukushima, and  $\varepsilon_{it}$  is a random error.

192

193 As explained in Section 2.1, the entirety of each of the eight municipalities is included  
194 in the “evacuation areas” and one municipality issued a mandatory evacuation order to  
195 all of its residents, resulting in nine “treated” municipalities in our sample. Note that we  
196 exclude municipalities with partial evacuation orders or without a mandatory evacuation  
197 order in the Fukushima region (Fukushima prefecture) and in tsunami-affected coastal  
198 areas from the “control” group ( $D_i = 0$ ): these municipalities presumably have been  
199 affected by the nuclear disaster and/or tsunami in 2011 and are not suitable for  
200 constructing the counterfactual trends to the evacuation areas.

201

202 The parameter of interest is  $\beta_\tau$ , which reflects a differential trend in the outcome  
203 variable for the treated (evacuation) group at  $t = \tau$ , compared with a corresponding  
204 trend for the control (non-evacuation) group. Because we exclude the time dummy  
205 variable at  $t = 2009$ ,  $\beta_\tau$  captures  $E(Y_{i\tau} - Y_{i2009} | D_i = 1) - E(Y_{i\tau} - Y_{i2009} | D_i = 0)$ ,  
206 which is identical to a conventional DID parameter. Note that fiscal year 2009 is the  
207 latest pre-disaster year when the complete annual data is available for the evacuation  
208 group. That is, the data for fiscal year 2010 is not available because the data for  
209 February 2011, which was supposed to be included in fiscal year 2010, is not available  
210 due to administrative disorder during the evacuation period (the Fukushima nuclear  
211 disaster occurred in March 2011).

212

213 As is now common in DID and event study literature [11, 12], in the pre-disaster period,  
214  $\tau < 2009$ ,  $\beta_\tau$  serves as a placebo parameter whose estimated value should be near zero  
215 if no differential trends exist between treated and control municipalities. In the  
216 post-disaster period,  $\tau \geq 2011$ ,  $\beta_\tau$  captures how the trend of mean outcomes for the  
217 treated municipalities deviates from the trend for the control municipalities given that  
218 no differential trends exist in the pre-disaster period.

219

220 Before examining estimation results, Figure 1 shows the trends of outcome variables on  
221 average for the treated group and the control group. These graphs indicate that in the  
222 pre-disaster period (2007-2009) the trends were more or less similar between the  
223 evacuation and control groups, indirectly validating the common trend assumption of  
224 DID estimation. In the post-disaster period (2011-2014) they significantly differed. In

225 2011, the year of the disaster and evacuation, the certification rate ( $C$ ) sharply increased  
226 in the evacuation group, whereas per-certified-individual benefits ( $B$ ) sharply decreased,  
227 resulting in a modest increase in per-elderly-individual benefits ( $Q$ ). Since 2012, the  
228 certification rate ( $C$ ) has remained high, and per-certified-individual benefits ( $B$ ) have  
229 more or less recovered to their pre-disaster trend. As a result, per-elderly-individual  
230 benefits ( $Q$ ) have sharply increased.

231

### 232 **3. Results**

233 Figure 2 presents DID estimation results based on equation (1). The three graphs in this  
234 figure show estimation results using different aggregated outcomes, namely  
235 per-elderly-individual benefits ( $Q$ ), certification rate ( $C$ ), and per-certified-individual  
236 benefits ( $B$ ) respectively. These outcome variables are based on all LTC benefits and  
237 certified individuals.

238

239 The results of this analysis imply that per-elderly-individual benefits ( $Q$ , left graph)  
240 increased from 2012 onward, and that this was explained by an increase in the  
241 certification rate ( $C$ , center graph) rather than per-certified-individual benefits ( $B$ , right  
242 graph). DID estimates for the certification rate are positive and statistically significant  
243 immediately after the evacuation, and the magnitude of the estimates implies that the  
244 evacuation has increased the certification rate by around 6 percentage points. DID  
245 estimates for per-certified-individual benefits decreased sharply in 2011 (and modestly  
246 in 2012), and this in turn is presumably a result of the disaster (earthquake and tsunami)  
247 and the ensuing evacuation necessitated by the nuclear plant accident. Note also that

248 placebo estimates in the pre-disaster period are around zero for all three outcomes,  
249 suggesting that the “parallel trends” assumption of DID seems to be plausible in the  
250 post-disaster period.

251

252 Figure 3 shows DID estimates for disaggregated outcomes by care level (see appendix  
253 Figure A.1-A.2 for the same estimation results with separated graphs). Firstly, the  
254 results of this analysis present a markedly different pattern in DID estimates for care  
255 level 5 outcomes. Negative estimates of the care level 5 certification rate ( $C$ ) after 2011  
256 suggest that some elderly people in this category may not have survived the disasters  
257 and evacuation (center graph). The estimates in this category gradually approach zero  
258 from 2011 to 2014, however, implying that the care level 5 certification rate was  
259 returning to its pre-evacuation level. DID estimates for care level 5  
260 per-certified-individual benefits ( $B$ ) are also strongly negative in 2011 and 2012. This is  
261 probably due to the evacuation, although the placebo estimates in 2008 fluctuate  
262 unstably (right graph). The estimates in this category also approached zero in 2013 and  
263 2014.

264

265 Secondly, when it comes to DID estimates for support levels 1-2 and care levels 1-4 in  
266 Figure 3, these show more or less similar trends that are consistent with the DID results  
267 in Figure 2. There are, however, two points worth mentioning. First, for these  
268 support/care levels, DID estimates for per-elderly-individual benefits ( $Q$ ) and the  
269 certification rate ( $C$ ) are always positive and almost always significantly different from  
270 zero from 2012 onward (left and center graphs. See 95% C.I. in appendix Figure A.1.  
271 and A.2.). The contribution to the aggregated positive impact on per-elderly individual

272 benefits is higher in care levels 1-3 than the other levels, but the DID estimates for the  
273 certification rate suggest that the number of certified individuals has been sharply rising  
274 in all care-need categories but care levels 4 and 5. Another interesting finding is that  
275 DID estimates for per-certified-individual benefits ( $B$ ) are also positive for 2012-2014  
276 (right graph), although the 95% C.I. is consistently above zero only for care levels 1 and  
277 2 (appendix Figure A.1, A.2).

278

279 In summary, the Fukushima disaster and the ensuing evacuation increased the overall  
280 certification rate but not overall per-certified-individual benefits (Figure 2). If we look  
281 at disaggregated outcomes by care level, the disaster and evacuation decreased the  
282 certification rate and per-certified-individual benefits for the highest care level, and  
283 increased the certification rates for the other care levels and the per-certified-individual  
284 benefits for some care levels (Figure 3).

285

286 Finally, given the finding that the positive impact of the evacuation on LTC benefits  
287 was mainly owing to an increase in the certification rate, it is worth looking into what  
288 drove this increase in this group. We therefore compared the trends of the numerator  
289 and the denominator of the certification rate (i.e. the number of certified people and the  
290 total number of elderly people) between the evacuation and the control groups. Figure 4  
291 clearly shows the main source of the increase in the certification rate in the evacuation  
292 group is an increase in the number of certified elderly (the numerator), although the  
293 number of those aged 65+ (the denominator) also decreased modestly in 2011.

294

#### 295 **4. Robustness checks**

296 Figure 2 clearly shows that the increase in LTC benefits per elderly individual after the  
297 disaster is caused by the increase in the certification rate, not in LTC benefits per  
298 certified individual. In this section we provide the results of several robustness checks  
299 on these primary findings. We implement robustness checks by estimating the same  
300 equation (1) using different combinations of the following two estimation settings.

301

302 First, we use two different weighting schemes for estimation: (1) not weighting  
303 observations as in our baseline estimation (i.e. ordinary least squares regression: OLS)  
304 and (2) weighting observations by the number of elderly individuals for the outcomes of  
305  $Q$  and  $C$  and by the number of certified individuals for the outcome of  $B$  (i.e. weighted  
306 least squares regression: WLS). There are pros and cons for weighting observations in  
307 aggregated data, but our purpose in using different weights is to ensure that our main  
308 findings are robust to different weighting schemes [13].

309

310 Second, we check the sensitivity of DID estimates by using three different samples (i.e.  
311 three different control groups). In the baseline estimation we used all the Japanese  
312 municipalities except for partial-evacuation and non-evacuation municipalities in  
313 Fukushima prefecture and tsunami-affected coastal areas. In this section we use the  
314 following three different samples: the same municipalities as in the baseline estimation  
315 (the baseline sample), the municipalities in the baseline sample whose outcome values  
316 (*all of  $Q$ ,  $C$  and  $B$* ) are within the minimum and maximum of the outcome values of the  
317 treated municipalities in all the three pre-disaster years (the trimmed sample), and  
318 evacuation municipalities and non-evacuation municipalities in Fukushima prefecture  
319 (the Fukushima sample).

320

321 In the case of the trimmed sample, 399 out of 1,496 control municipalities in the  
322 baseline sample are kept in the sample. This trimming procedure is somewhat arbitrary,  
323 but it enables us to exclude municipalities whose outcome values are far away from and  
324 not comparable to those of the evacuation municipalities in the pre-disaster period.  
325 Appendix Figure A.3 shows that this trimming procedure does in fact make the  
326 averaged outcomes of the control areas quite similar to those of the evacuation areas in  
327 the pre-disaster period.

328

329 In the Fukushima sample, we use 47 non-evacuation municipalities in Fukushima,  
330 which are excluded from the baseline sample, as an alternative control group. We keep  
331 partial-evacuation municipalities in Fukushima out of the control group. As we already  
332 discussed, non-evacuation municipalities in Fukushima may not be an appropriate  
333 control group. It is nevertheless worthwhile to compare the evacuation municipalities in  
334 Fukushima with the non-evacuation municipalities in Fukushima because of their  
335 geographic and socio-economic similarities in the pre-disaster period.

336

337 Figure 5 provides the results of our robustness checks. Because we use two weighting  
338 schemes (OLS and WLS) and three samples (baseline, trimmed, and Fukushima  
339 samples), we implemented six, including one baseline, DID estimations for each  
340 outcome. Some estimated coefficients are different from the baseline DID estimation  
341 (i.e. OLS with the baseline sample) but overall tendencies are similar to the baseline  
342 analysis for all three outcomes.

343

## 344 **5. Discussion**

345 It has been reported that LTC benefits have increased in the peripheral area of the  
346 damaged nuclear plant [14]. Our findings suggest that the increase in LTC benefits can  
347 be associated with the impact of the increase in the number of people newly certified to  
348 receive LTC benefits after the mandatory evacuation.

349

350 There are several reasons for this. First, as the communities in the mandatory evacuation  
351 zones were severely damaged, the amount of informal care provided by young members  
352 of the community seems to have declined after the disaster. Second, evacuation could  
353 have worsened ADL, dementia, and other health problems among the elderly population  
354 [15]. Our study was consistent with previous studies demonstrating that the number of  
355 people relying on public LTC increased after the disaster [4-6]. Third, residents in the  
356 mandatory evacuation areas were exempted from copayment according to the  
357 compensation program. This financial support could have increased the demand for  
358 long-term care [16].

359

360 In addition, it is possible that with their greater mobility and resilience the healthy  
361 elderly population in a community who do not require long-term care may be more  
362 likely than the rest of the population to change their resident registration from the  
363 evacuation areas to other areas even though it may lead to the cessation of financial  
364 support. Our analysis, however, found only a modest decline in the number of elderly  
365 people in the evacuation group.

366



367 Another important finding is that both the certification rate and the  
368 per-certified-individual benefits for the highest care level (care level 5) decreased  
369 immediately after the disaster (2011), while the corresponding outcomes for the lower  
370 care levels tended to gradually increase after the evacuation. Such heterogeneous effects  
371 on the evacuated elderly suggest that special care soon after the disaster is particularly  
372 important for the most vulnerable group, whereas increasing LTC needs among the  
373 elderly due to the evacuation are of greater importance from a longer perspective.

374

375 This study demonstrates the possibility that an increase in the utilization of LTC  
376 services immediately after a mass evacuation can be attributed to increases in people  
377 newly certified to receive LTC benefits. This implies that universally provided LTC  
378 insurance might have worked as a quick buffer that mitigates some of the negative  
379 impacts of evacuation, such as the loss of informal care and evacuation-related health  
380 deterioration [17]. At the same time, it highlights the importance of the question of how  
381 such exceptional costs incurred by evacuations are to be financed as a policy issue to be  
382 addressed in the context of the current municipality-based financing system of Japanese  
383 LTC insurance. In order to cope with the increase in need for long-term care and  
384 associated costs after disasters in aging societies, both formal long-term care services  
385 and social support for informal care for evacuees should be considered important.

386

## 387 **References**

- 388 1. Council NR, Grid I. Global Report on Internal Displacement. Consultado en  
389 [http://www internal-displacement](http://www.internal-displacement.org/publications/2016/2016-global-report-on-internal-displacement-grid-2016)  
390 [org/publications/2016/2016-global-report-on-internal-displacement-grid-2016](http://www.internal-displacement.org/publications/2016/2016-global-report-on-internal-displacement-grid-2016). 2016.
- 391 2. Hasegawa J, Hidaka H, Kuriyama S, Obara T, Hashimoto K, Tateda Y, et al.  
392 Change in and long-term investigation of neuro-otologic disorders in disaster-stricken  
393 Fukushima prefecture: retrospective cohort study before and after the Great East Japan  
394 Earthquake. *PloS one*. 2015;10(4):e0122631.
- 395 3. Morita T, Nomura S, Tsubokura M, Leppold C, Gilmour S, Ochi S, et al.  
396 Excess mortality due to indirect health effects of the 2011 triple disaster in Fukushima,  
397 Japan: a retrospective observational study. *Journal of epidemiology and community*  
398 *health*. 2017;71(10):974-80. doi: 10.1136/jech-2016-208652. PubMed PMID:  
399 28830951.
- 400 4. Tomata Y, Kakizaki M, Suzuki Y, Hashimoto S, Kawado M, Tsuji I. Impact  
401 of the 2011 Great East Japan Earthquake and Tsunami on functional disability among  
402 older people: a longitudinal comparison of disability prevalence among Japanese  
403 municipalities. *Journal of epidemiology and community health*. 2014;68(6):530-3. doi:  
404 10.1136/jech-2013-203541. PubMed PMID: 24570399.
- 405 5. Tomata Y, Suzuki Y, Kawado M, Yamada H, Murakami Y, Mieno MN, et al.  
406 Long-term impact of the 2011 Great East Japan Earthquake and tsunami on functional  
407 disability among older people: A 3-year longitudinal comparison of disability  
408 prevalence among Japanese municipalities. *Social science & medicine*. 2015;147:296-9.  
409 doi: 10.1016/j.socscimed.2015.11.016. PubMed PMID: 26613535.
- 410 6. Uchimura M, Kizuki M, Takano T, Morita A, Seino K. Impact of the 2011  
411 Great East Japan Earthquake on community health: ecological time series on transient  
412 increase in indirect mortality and recovery of health and long-term-care system. *Journal*  
413 *of epidemiology and community health*. 2014;68(9):874-82. doi:  
414 10.1136/jech-2014-204063. PubMed PMID: 24847089.
- 415 7. Tsutsui T, Muramatsu N. Japan's Universal Long - Term Care System  
416 Reform of 2005: Containing Costs and Realizing a Vision. *Journal of the American*  
417 *Geriatrics Society*. 2007;55(9):1458-63.

- 418 8. Ministry of Internal Affairs and Communications. Portal Site of Official  
419 Statistics of Japan [cited 2017 September 23]. Available from:  
420 <https://www.e-stat.go.jp>.
- 421 9. Cotton J. On the decomposition of wage differentials. *The review of*  
422 *economics and statistics*. 1988;236-43.
- 423 10. OECD. Japan's Compensation System for Nuclear Damage 2012.
- 424 11. Finkelstein A. The aggregate effects of health insurance: Evidence from the  
425 introduction of Medicare. *The quarterly journal of economics*. 2007;122(1):1-37.
- 426 12. Dobkin C, Finkelstein A, Kluender R, Notowidigdo MJ. The Economic  
427 Consequences of Hospital Admissions. *Am Econ Rev*. 2018;108(2):308-52. PubMed  
428 PMID: 30091560.
- 429 13. Solon G, Haider SJ, Wooldridge JM. What are we weighting for? *Journal of*  
430 *Human resources*. 2015;50(2):301-16.
- 431 14. Morita T, Leppold C, Tsubokura M, Nemoto T, Kanazawa Y. The increase in  
432 long-term care public expenditure following the 2011 Fukushima nuclear disaster.  
433 *Journal of epidemiology and community health*. 2016;70(7):738. doi:  
434 10.1136/jech-2015-206983. PubMed PMID: 27288528.
- 435 15. Fernandez LS, Byard D, Lin C-C, Benson S, Barbera JA. Frail elderly as  
436 disaster victims: emergency management strategies. *Prehospital and disaster medicine*.  
437 2002;17(2):67-74.
- 438 16. Matsuyama Y, Tsuboya T, Bessho SI, Aida J, Osaka K. Copayment  
439 Exemption Policy and Healthcare Utilization after the Great East Japan Earthquake.  
440 *Tohoku J Exp Med*. 2018;244(2):163-73. doi: 10.1620/tjem.244.163. PubMed PMID:  
441 29503394.
- 442 17. Yasumura S, Goto A, Yamazaki S, Reich M. Excess mortality among  
443 relocated institutionalized elderly after the Fukushima nuclear disaster. *Public health*.  
444 2013;127(2):186-8.  
445

| VARIABLES                                           | Sample size | Mean   | Min   | Max    |
|-----------------------------------------------------|-------------|--------|-------|--------|
| Per-elderly-individual benefits (all)               | 10,535      | 25.679 | 0.000 | 66.630 |
| Per-elderly-individual benefits (support level 1)   | 10,535      | 0.402  | 0.000 | 2.330  |
| Per-elderly-individual benefits (support level 2)   | 10,535      | 0.892  | 0.000 | 3.270  |
| Per-elderly-individual benefits (care level 1)      | 10,535      | 3.018  | 0.000 | 21.250 |
| Per-elderly-individual benefits (care level 2)      | 10,535      | 4.358  | 0.000 | 35.917 |
| Per-elderly-individual benefits (care level 3)      | 10,535      | 5.421  | 0.000 | 20.333 |
| Per-elderly-individual benefits (care level 4)      | 10,535      | 5.898  | 0.000 | 19.000 |
| Per-elderly-individual benefits (care level 5)      | 10,535      | 5.692  | 0.000 | 23.552 |
| Certification rate (all)                            | 10,535      | 0.169  | 0.037 | 0.402  |
| Certification rate (support level 1)                | 10,535      | 0.020  | 0.000 | 0.097  |
| Certification rate (support level 2)                | 10,535      | 0.022  | 0.000 | 0.084  |
| Certification rate (care level 1)                   | 10,535      | 0.031  | 0.000 | 0.250  |
| Certification rate (care level 2)                   | 10,535      | 0.030  | 0.000 | 0.154  |
| Certification rate (care level 3)                   | 10,535      | 0.025  | 0.000 | 0.074  |
| Certification rate (care level 4)                   | 10,535      | 0.022  | 0.000 | 0.069  |
| Certification rate (care level 5)                   | 10,535      | 0.020  | 0.000 | 0.065  |
| Per-certified-individual benefits (all)             | 10,535      | 152.9  | 0.0   | 474.0  |
| Per-certified-individual benefits (support level 1) | 10,476      | 20.2   | 0.0   | 112.0  |
| Per-certified-individual benefits (support level 2) | 10,498      | 41.1   | 0.0   | 192.8  |
| Per-certified-individual benefits (care level 1)    | 10,524      | 98.2   | 0.0   | 417.0  |
| Per-certified-individual benefits (care level 2)    | 10,531      | 149.1  | 0.0   | 862.0  |
| Per-certified-individual benefits (care level 3)    | 10,528      | 221.2  | 0.0   | 691.0  |
| Per-certified-individual benefits (care level 4)    | 10,525      | 264.6  | 0.0   | 881.0  |
| Per-certified-individual benefits (care level 5)    | 10,525      | 287.8  | 0.0   | 732.0  |

**Table 1: Descriptive statistics.** Note that data for per-certified-individual benefits in some care levels are missing when the number of certified individuals in these care levels are is zero. In addition, the maximum value of per-certified-individual benefits for care level 2 appears to be unusually high, but this is due to the fact that this variable is calculated as the ratio of annual LTC benefits to the number of certified elderly individuals at a certain point. Thus this variable tends to fluctuate in municipalities with small numbers of certified elderly individuals. Source: The Survey of Long-term Care Benefit Expenditures. The unit of “benefit” is 1,000 points (i.e. 10,000 JPY or around 100 USD in standard areas).

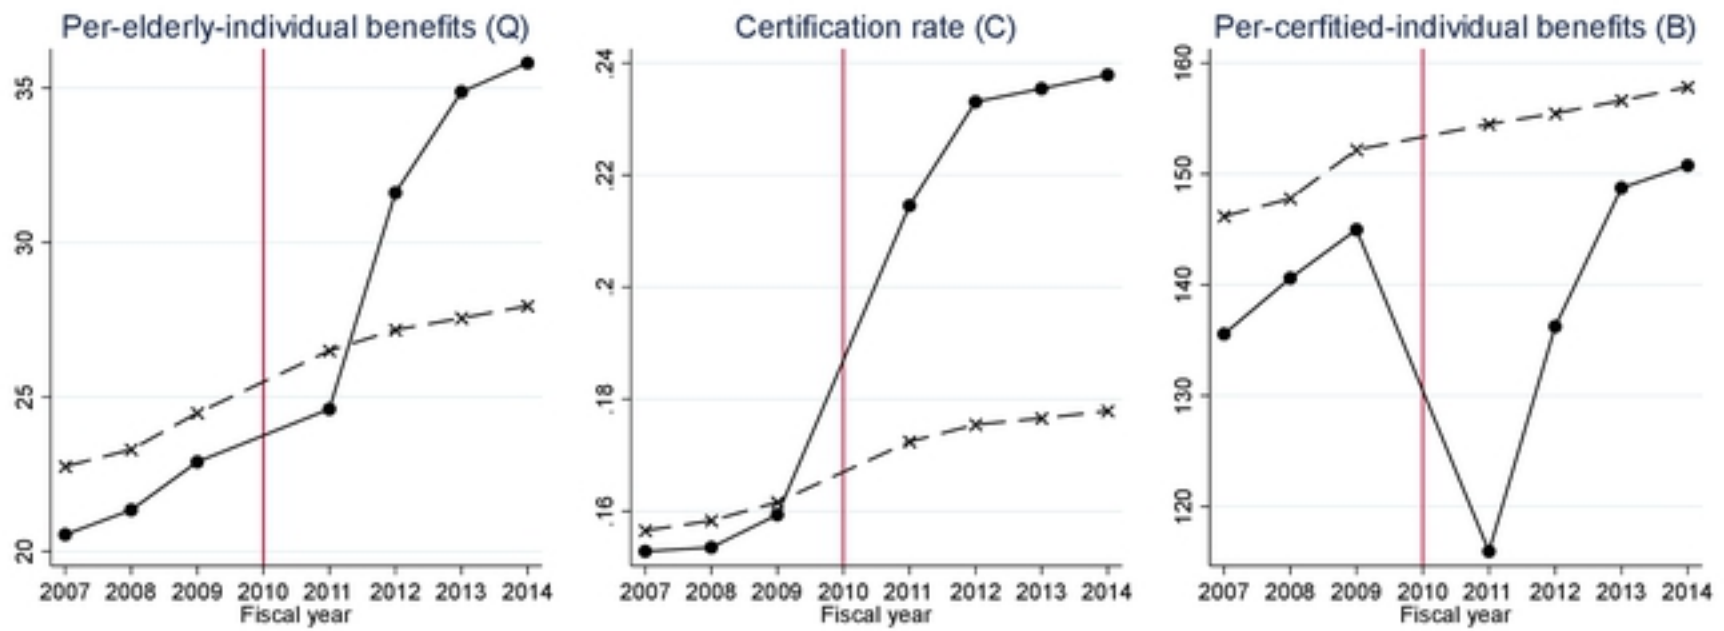

bioRxiv preprint doi: <https://doi.org/10.1101/669499>; this version posted June 12, 2019. The copyright holder for this preprint (which was not certified by peer review) is the author/funder, who has granted bioRxiv a license to display the preprint in perpetuity. It is made available under aCC-BY 4.0 International license.

**Figure 1: Time trends of long-term care benefits in the Fukushima mandatory evacuation group and the non-evacuation control group.** Per-elderly-individual benefits: long-term-care benefits per elderly person. Certification rate: the percentage of people aged 65 and older who were certified to receive long-term care services. Per-certified-individual benefits: long-term care benefits per certified individual. The unit of “benefit” is 1,000 points (10,000 JPY or around 100 USD in standard areas).

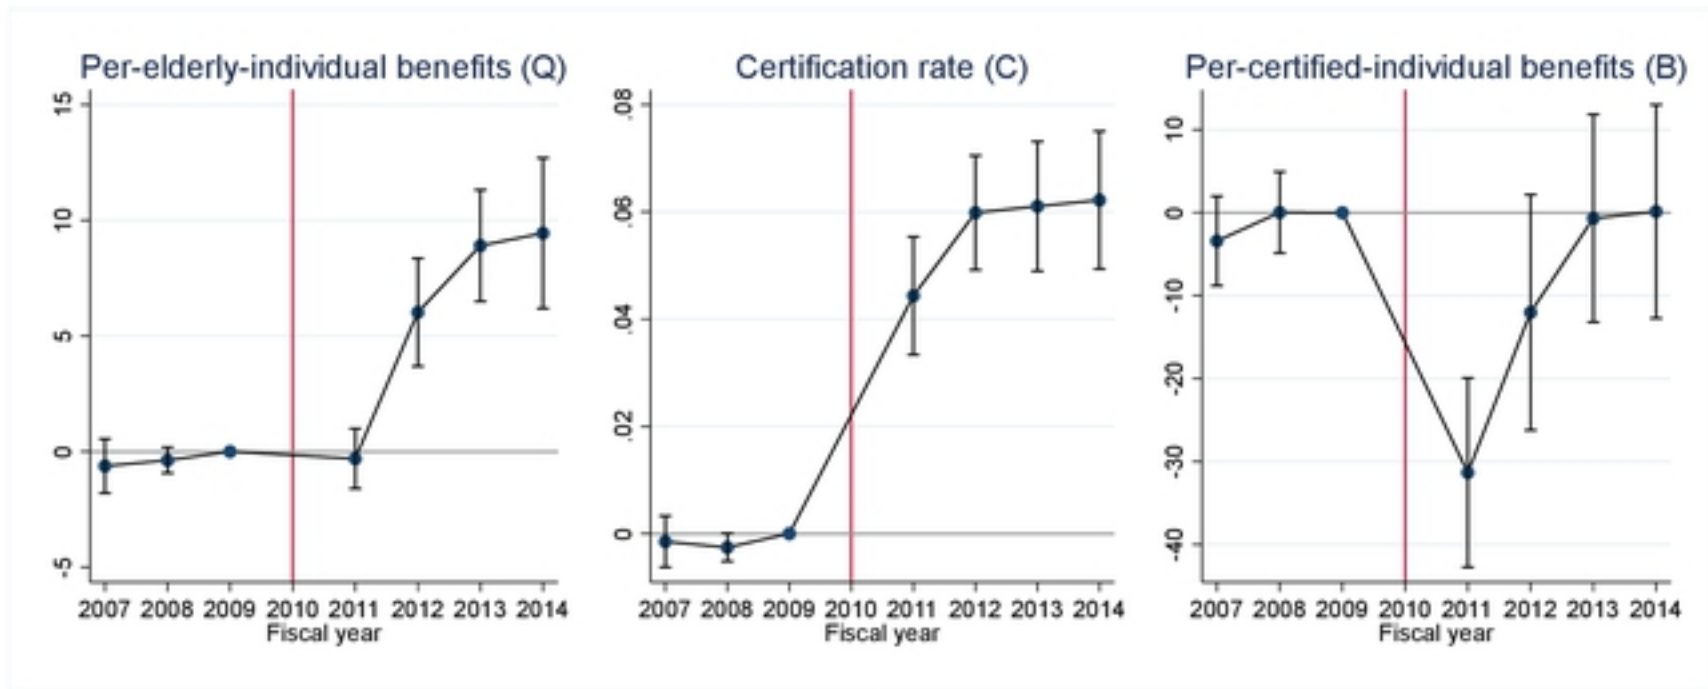

bioRxiv preprint doi: <https://doi.org/10.1101/669499>; this version posted June 12, 2019. The copyright holder for this preprint (which was not certified by peer review) is the author/funder, who has granted bioRxiv a license to display the preprint in perpetuity. It is made available under aCC-BY 4.0 International license.

**Figure 2: Difference-in-differences (DID) estimates and their 95% confidence intervals.** Confidence intervals are calculated by clustered robust standard errors clustered by municipality. All the DID estimates are estimates for  $\beta_\tau$  in equation (1). The unit of “benefit” is 1,000 points (10,000 JPY or around 100 USD in standard areas).

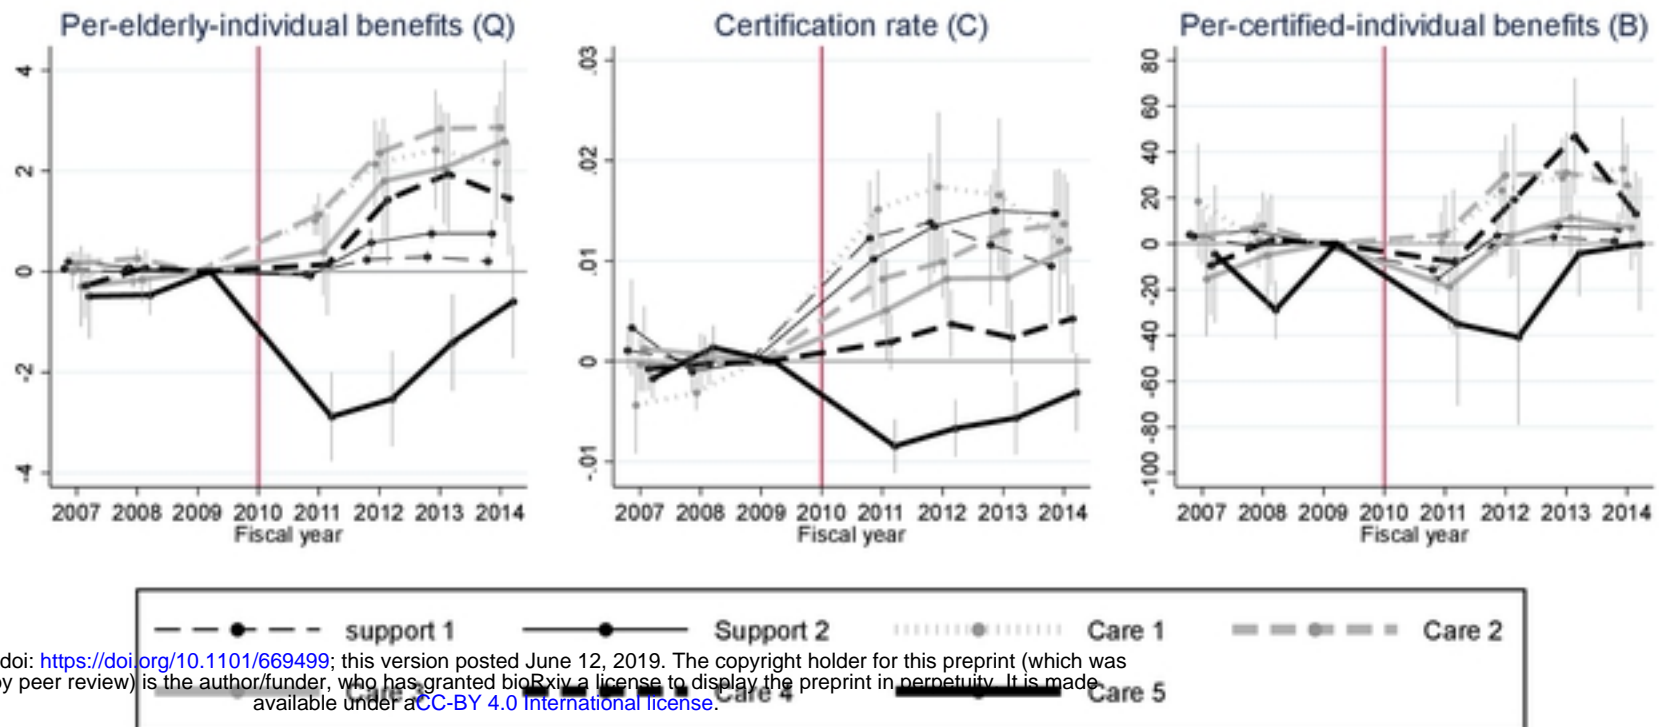

**Figure 3: Difference-in-differences (DID) estimates for each care level and their 95% confidence intervals.** Confidence intervals are calculated by clustered robust standard errors clustered by municipality. All DID estimates are estimates for  $\beta_\tau$  in equation (1). The unit of “benefit” is 1,000 points (10,000 JPY or around 100 USD in standard areas).

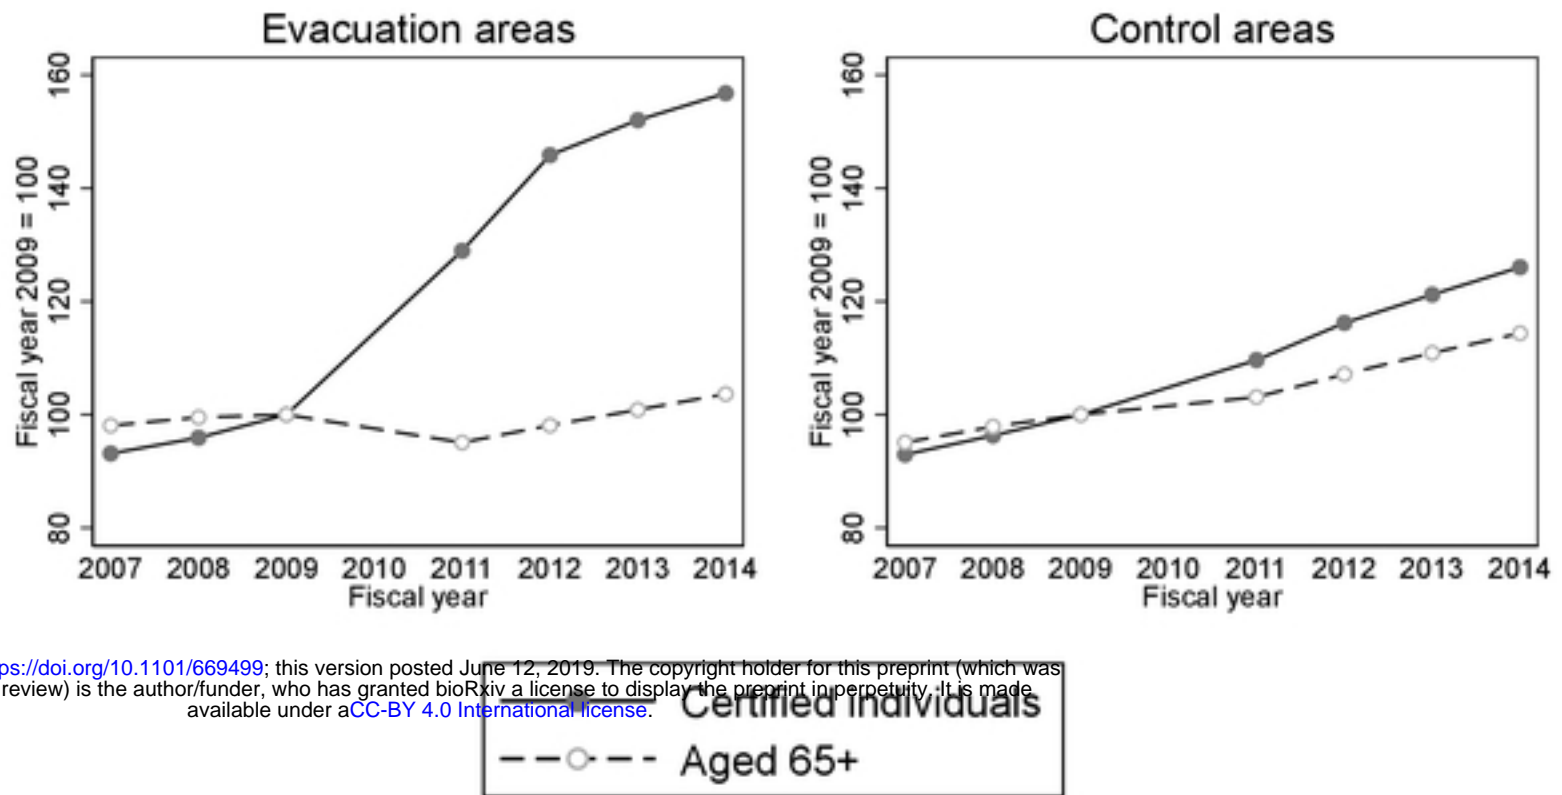

bioRxiv preprint doi: <https://doi.org/10.1101/669499>; this version posted June 12, 2019. The copyright holder for this preprint (which was not certified by peer review) is the author/funder, who has granted bioRxiv a license to display the preprint in perpetuity. It is made available under aCC-BY 4.0 International license.

**Figure 4: Trends in the numbers of certified individuals and aged 65+ in the evacuation and control areas.** Certified individuals: the number of people aged 65 and older who were certified to receive long-term care services. Aged 65+: the number of people aged 65 and older. The numbers are standardized to 100 in 2009.



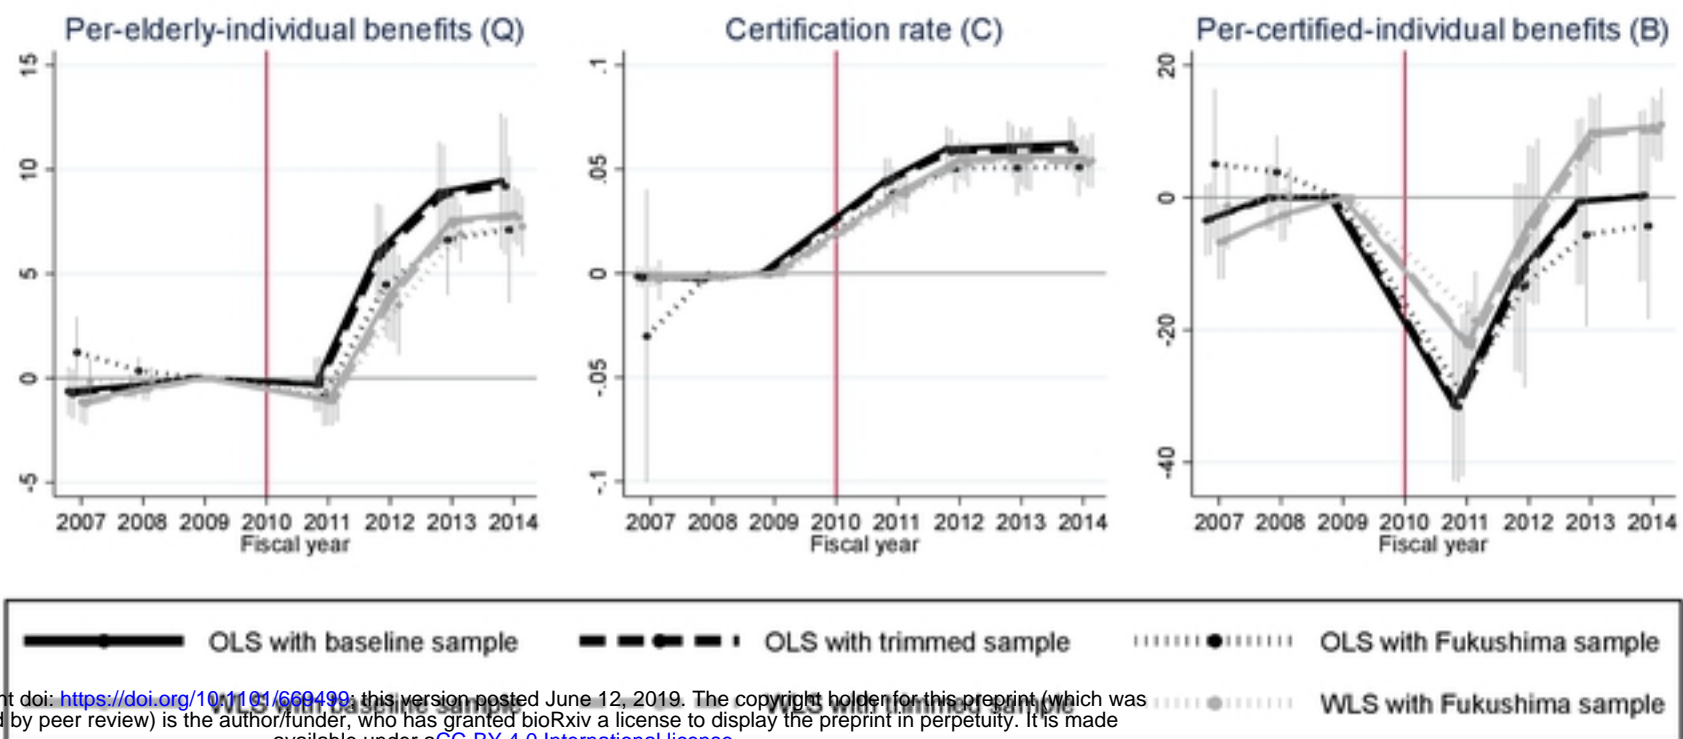

bioRxiv preprint doi: <https://doi.org/10.1101/669499>; this version posted June 12, 2019. The copyright holder for this preprint (which was not certified by peer review) is the author/funder, who has granted bioRxiv a license to display the preprint in perpetuity. It is made available under aCC-BY 4.0 International license.

**Figure 5: Difference-in-differences (DID) estimates for different weighting schemes and samples and their 95% confidence intervals.** Confidence intervals are calculated by clustered robust standard errors clustered by municipality. All DID estimates are estimates for  $\beta_\tau$  in equation (1). The unit of “benefit” is 1,000 points (10,000 JPY or around 100 USD in standard areas). “OLS” is a normal ordinary least squares regression and “WLS” is a weighted least squares regression in which the weight is the number of elderly individuals for the outcomes of  $Q$  and  $C$  and the number of certified individuals for the outcome of  $B$ . The trimmed sample includes the municipalities in the baseline sample whose outcome values are within the minimum and maximum of outcome values of the treated municipalities in all three pre-disaster years. The Fukushima sample contains the evacuation and non-evacuation municipalities in Fukushima prefecture.

## APPENDICES

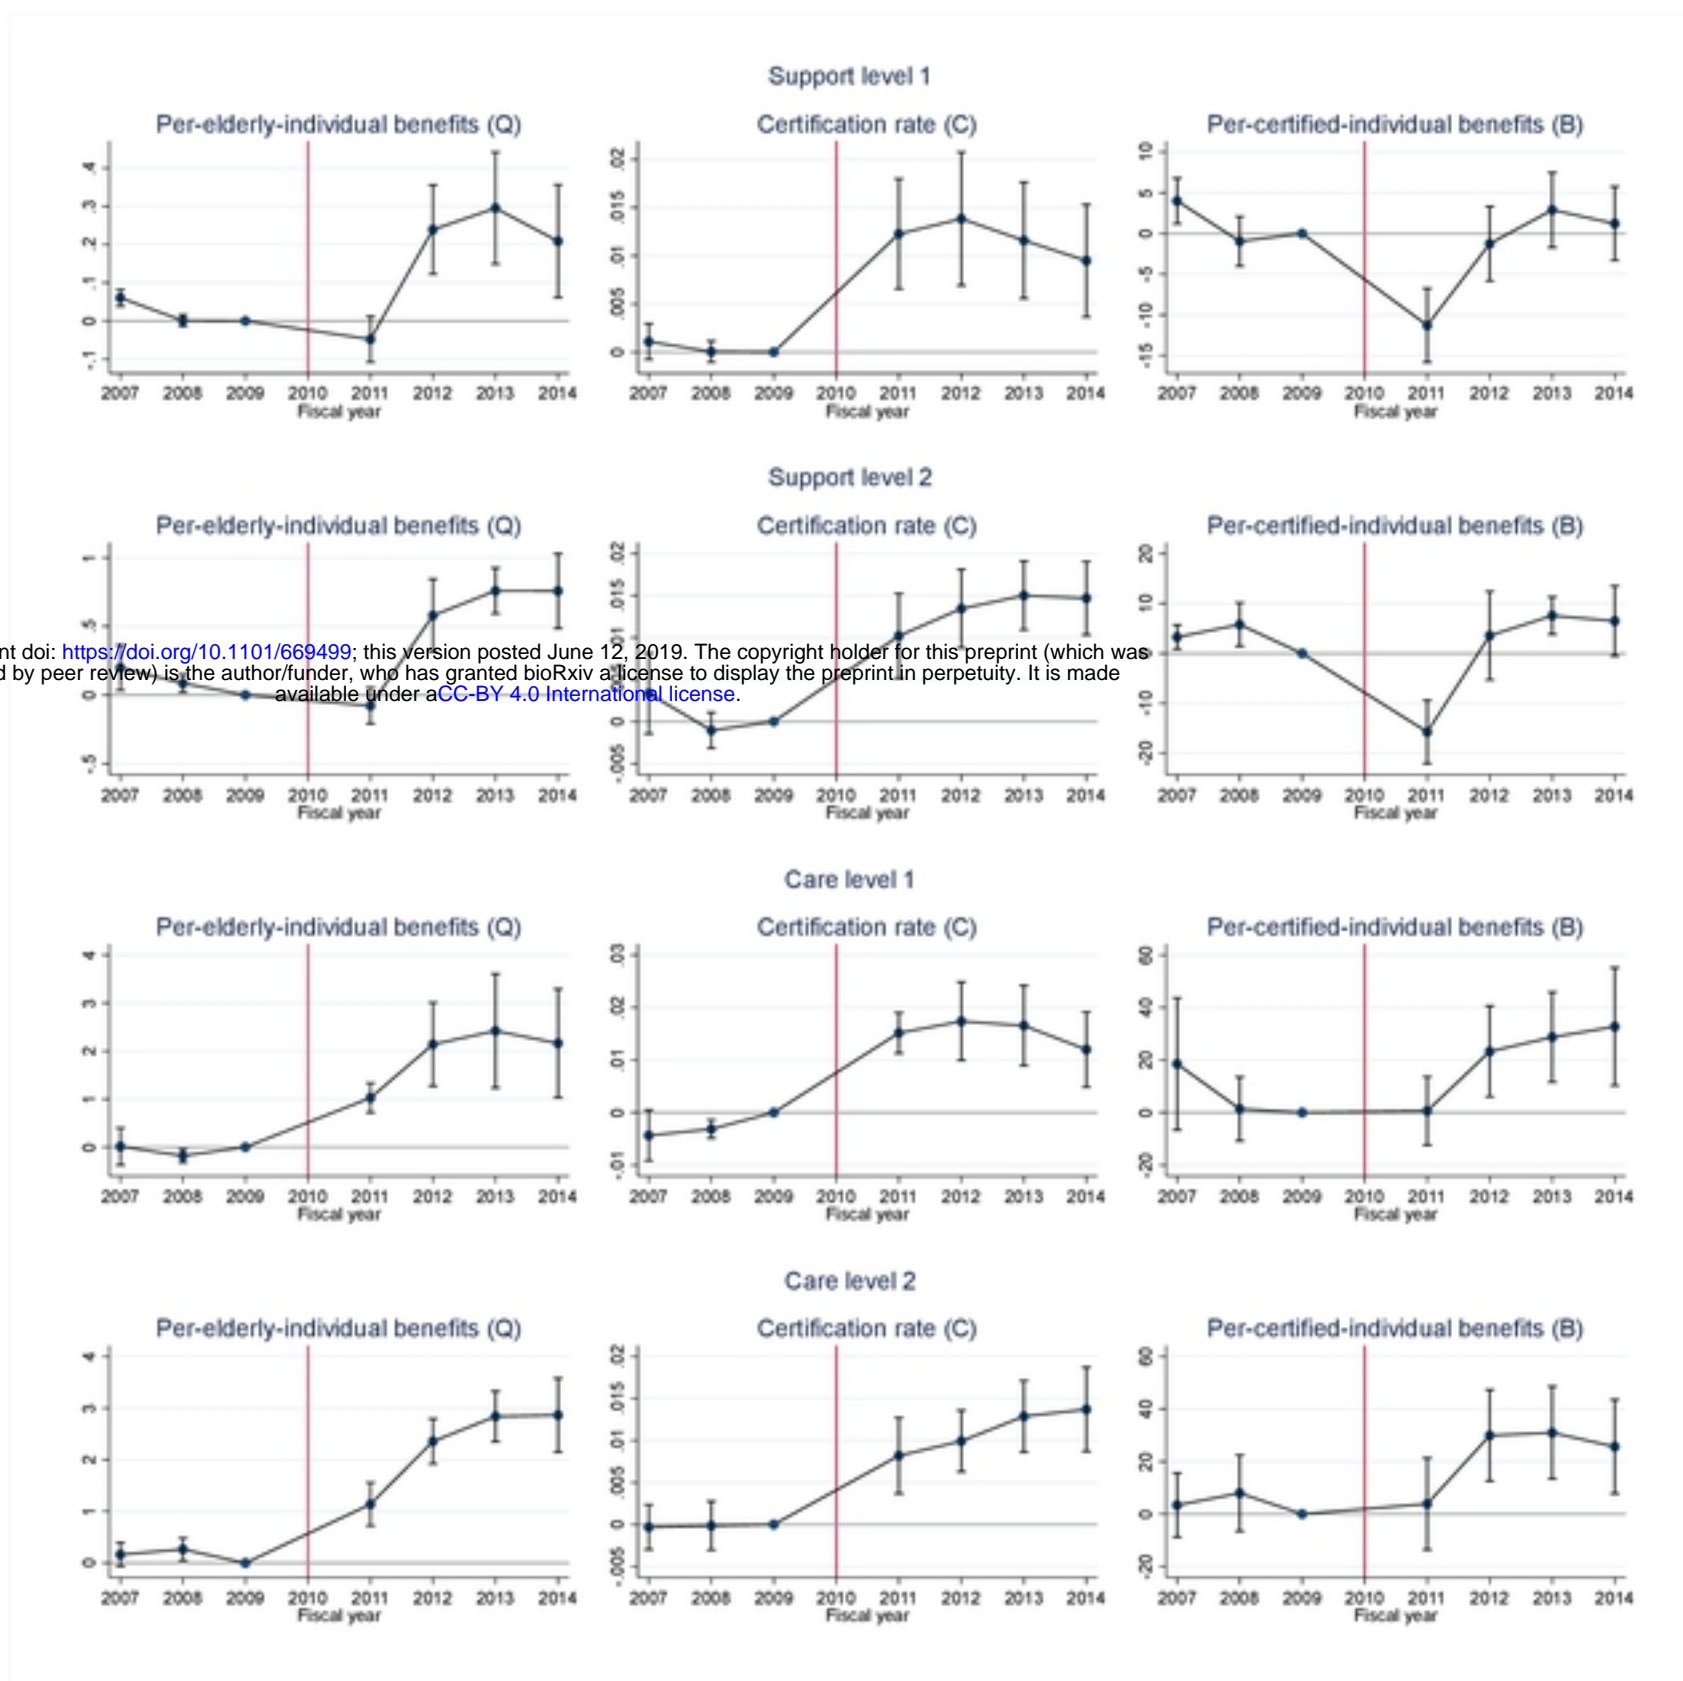

bioRxiv preprint doi: <https://doi.org/10.1101/669499>; this version posted June 12, 2019. The copyright holder for this preprint (which was not certified by peer review) is the author/funder, who has granted bioRxiv a license to display the preprint in perpetuity. It is made available under aCC-BY 4.0 International license.

**Figure A.1: Difference-in-differences (DID) estimates and their 95% confidence intervals (lower care levels).** Confidence intervals are calculated by clustered robust standard errors clustered by municipality. All DID estimates are estimates for  $\beta_\tau$  in equation (1). The unit of “benefit” is 1,000 points (10,000 JPY or around 100 USD in standard areas).

bioRxiv preprint doi: <https://doi.org/10.1101/669499>; this version posted June 12, 2019. The copyright holder for this preprint (which was not certified by peer review) is the author/funder, who has granted bioRxiv a license to display the preprint in perpetuity. It is made available under aCC-BY 4.0 International license.

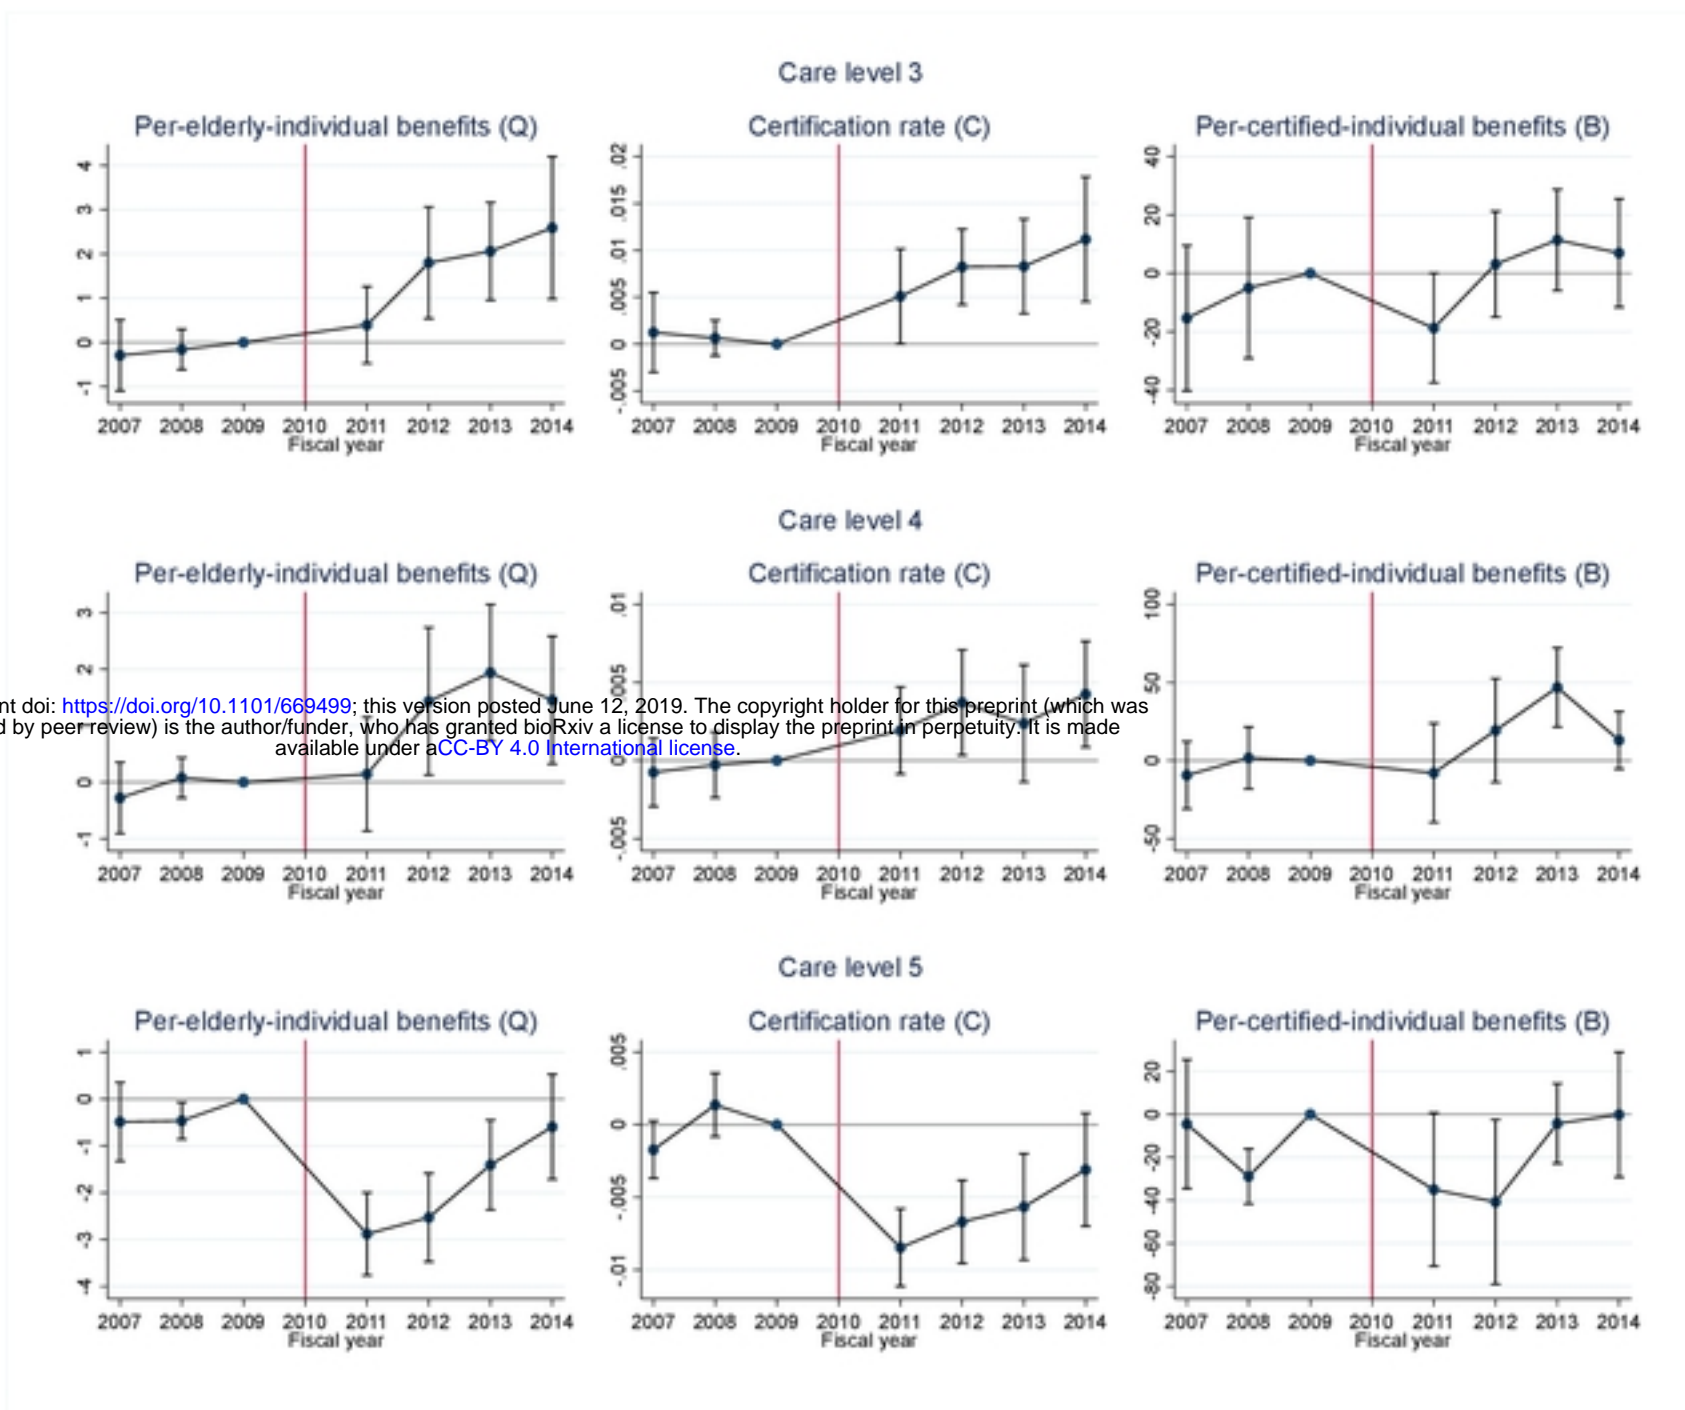

**Figure A.2: Difference-in-differences (DID) estimates and their 95% confidence intervals (higher care levels).** Confidence intervals are calculated by clustered robust standard errors clustered by municipality. All DID estimates are estimates for  $\beta_\tau$  in equation (1). The unit of “benefit” is 1,000 points (10,000 JPY or around 100 USD in standard areas).

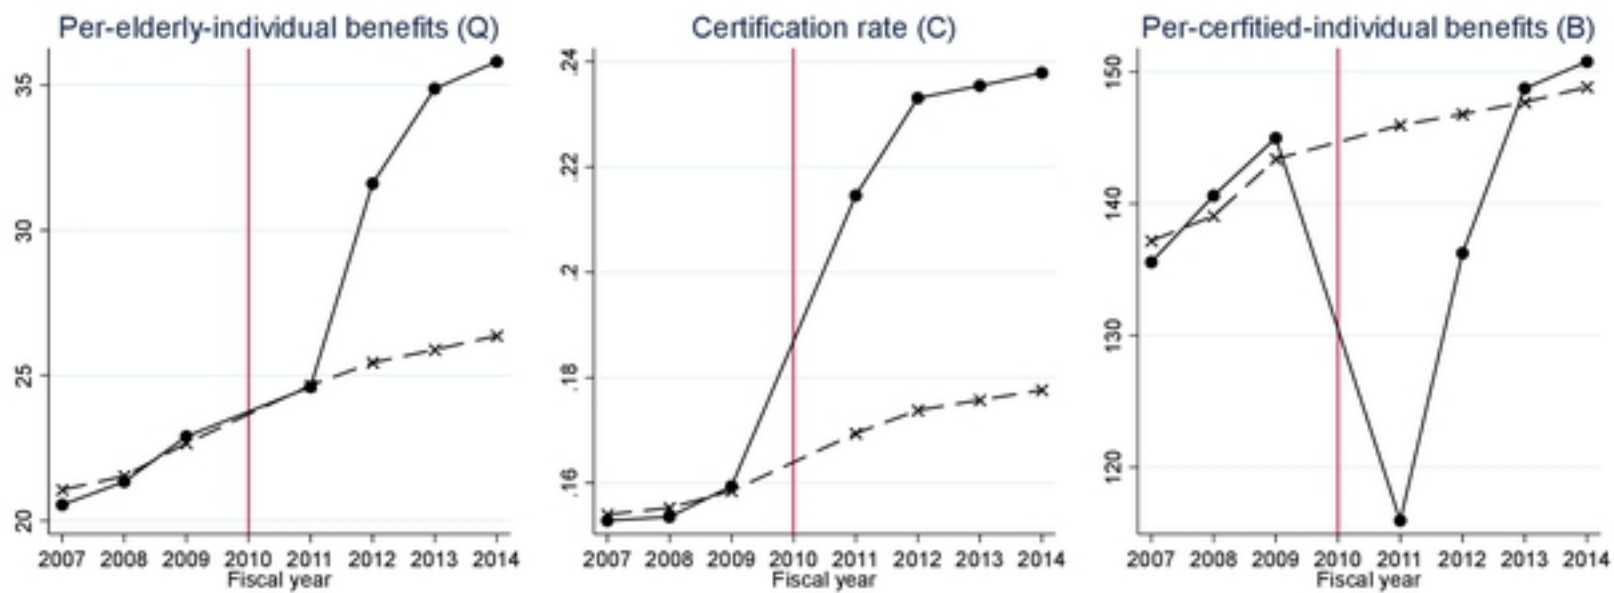

bioRxiv preprint doi: <https://doi.org/10.1101/669499>; this version posted June 12, 2019. The copyright holder for this preprint (which was not certified by peer review) is the author/funder, who has granted bioRxiv a license to display the preprint in perpetuity. It is made available under aCC-BY 4.0 International license.

**Figure A.3: Time trends of long-term care benefits in the Fukushima mandatory evacuation group and the non-evacuation control group with the trimmed sample.** Per-elderly-individual benefits: long-term-care benefits per elderly person. Certification rate: the percentage of people aged 65 and older who were certified to receive long-term care services. Per-certified-individual benefits: long-term care benefits per certified individual. The unit of “benefit” is 1,000 points (10,000 JPY or around 100 USD in standard areas). The trimmed sample includes the municipalities in the baseline sample whose outcome values are within the minimum and maximum of outcome values of the treated municipalities in all three pre-disaster years.
